# Supplementary material for: Fixation of CO2 along with bromopyridines on a silver electrode
Source: R Soc Open Sci. 2018 Aug 15;5(8):180897. doi: 10.1098/rsos.180897 (PMC6124031; doi:10.1098/rsos.180897)
Supplement: Cyclic voltammograms of 10 mM o–bromopyridine on a GC electrode in DMF with 0.1 M TEABF4 at (a) v=0.1 V/s, (b) 0.2 V/s, (c) 0.3 V/s, (d) 0.4 V/s, (e) 0.5 V/s, (f) 0.6 V/s, (g) 0.7 V/s, (h) 0.8 V/s and (i) 0.9 V/s. [file rsos180897supp1.docx]

Royal society open science

Electronic Supplementary Materials

Fixation of CO2 along with bromopyridines on a silver electrode

Yingtian Zhanga, Shuxian Yua, Peipei Luoa, Shisong Xua, Xianxi Zhanga, Huawei Zhoua, Jiyuan Dua, Jie Yanga, Nana Xina, Yuxia Konga, Junhai Liua, Baoli Chen*­a and Jiaxing Lu*b

aShandong Provincial Key Laboratory of Chemical Energy Storage and Novel Cell Technology, College of Chemistry and Chemical Engineering, Liaocheng University, Liaocheng 252059, China

bShanghai Key Laboratory of Green Chemistry and Chemical Processes, School of Chemistry and Molecular Engineering, East China Normal University, Shanghai200062, China

** Corresponding authors: E-mail: goodchenbaoli@163.com； E-mail:* [*jxlu@chem.ecnu.edu.cn*](mailto:jxlu@chem.ecnu.edu.cn)

**Figure S1** Cyclic voltammograms of 10 mM *o*–bromopyridine on a GC electrode in DMF with 0.1 M TEABF4 at (a) *v*=0.1 V/s, (b) 0.2 V/s, (c) 0.3 V/s, (d) 0.4 V/s, (e) 0.5 V/s, (f) 0.6 V/s, (g) 0.7 V/s, (h) 0.8 V/s and (i) 0.9 V/s.

**Table S1**

Effect of THF, MeOH and DMSO on the fixation of CO2 along with *o*–bromopyridinea

| Entry | Solvent | Yieldb of **2a** (%) |
| --- | --- | --- |
| 1 | THF | --- |
| 2 | MeOH | 1.9 |
| 3 | DMSO | --- |

a Electrolytic conditions: 10 mL solvent, 0.1 M TBABr, 0.1 M *o*–bromopyridine, 8 mA/cm2, Ag cathode, Mg anode, 0 °C, 2 F/mol charge passed, 1 atm CO2

b The yield based on starting substrate is determined by HPLC

**Table S2**

Fixation of CO2 along with *o*–bromopyridine and *o*–chloropyridinea

| Entry | Substrate | Yieldb of **2a** (%) |
| --- | --- | --- |
| 1 | *o*−bromopyridine | 55.0 |
| 2 | *o*–chloropyridine | 16.2 |

a Electrolytic conditions: 10 mL DMF, 0.1 M TBABr, 0.1 M substrate, 8 mA/cm2, Ag cathode, Mg anode, 0 °C, 2 F/mol charge passed, 1 atm CO2

b The yield based on starting substrate is determined by HPLC
